# Supplementary material
Source: PubMed Central journal article supplement (PMC5710627)
Supplement: jamapediatr-e172127-s001.pdf [file jamapediatr-e172127-s001.pdf]

## Supplementary Online Content

Bennett TD, DeWitt PE, Greene TH, et al. Functional outcome after intracranial pressure monitoring for children with severe traumatic brain injury. *JAMA Pediatr.* Published online August 28, 2017. doi:10.1001/jamapediatrics.2017.2127

### **eAppendix.** Methods

**eFigure 1.** Standardized Differences for Propensity Model Covariates, Before and After Propensity Weighting

**eFigure 2.** ICP Monitoring Rates by Hospital

**eFigure 3.** Choice of Matching Weights Did Not Affect Primary Analysis

**eFigure 4.** Sensitivity Analyses for Robustness to Unmeasured Confounding

**eTable 1.** Variable Definitions

**eTable 2.** Propensity Model Covariates

**eTable 3.** Demographic and Hospital Characteristics

**eTable 4.** Injury Characteristics

**eReferences.**

This supplementary material has been provided by the authors to give readers additional information about their work.

## **eAppendix. Methods**

### **Data Sources and Probabilistic Linkage**

#### **PHIS**

PHIS is a benchmarking and quality improvement database containing inpatient data from 44 U.S. children's hospitals with more than 500,000 discharges per year.<sup>1</sup> PHIS contains administrative data, diagnoses, and procedures as well as utilization information for pharmacy, imaging, laboratory, supply, nursing, and therapy services. These utilization data are coded using Clinical Transaction Classification (CTC) codes<sup>2</sup> and are grouped into 24-hour periods (days of service). PHIS data are only available to approved researchers at member hospitals. PHIS data are subjected to 175 reliability and validity checks and are accepted into the database when classified errors occur in <2% of a hospital's quarterly data.<sup>3</sup> Systematic data quality monitoring includes bimonthly coding consensus meetings, coding consistency reviews, and quarterly data quality reports.<sup>4</sup>

#### **NTDB**

The NTDB contains standardized trauma registry data from more than 3 million admissions at 900 trauma centers in the United States.<sup>5</sup> The NTDB contains no protected health information (PHI). The NTDB has a continuous data quality improvement process.<sup>5</sup>

#### **Dataset Linkage**

Briefly, we applied Markov chain Monte Carlo-augmented probabilistic linkage to records of injured children (< 18 years old at admission) in the NTDB and PHIS databases. We validated the accuracy of the linkage using identified data from a single center that submits to both databases. The linkage method is accurate for the patients in the current study: sensitivity 88%, positive predictive value (PPV) 98%, and specificity 99.99%.<sup>6</sup> In the context of the current dataset containing approximately 3,000 patients, a PPV of 98% suggests that as many as 60 patients might be false positive links. This is a limitation of the current dataset. False negatives in the validation linkage were found to be primarily patients who had short hospital stays (<72 hours) and were discharged home without new home care supports.<sup>6</sup> The original linkage was 2007-2010, and the same methods were applied to data from 2011-2012 to create the 2007-2012 cohort for this study.

#### **Covariate Definitions**

We coded the presence of "medical" complications such as cardiac arrest and seizures<sup>7</sup> using ICD-9-CM diagnosis codes from the PHIS file (eTable 1). For injury mechanism, injury type, and specific injury diagnoses including abuse/assault<sup>9,10</sup>, we used ICD-9-CM diagnosis codes from the NTDB file. We categorized injury mechanism using the external cause-of-injury matrix created by the CDC (with ICD-9-CM diagnosis code 995.5 added to the child abuse/assault category) and injury type using the Barell matrix.<sup>11,12</sup> Injury severity score (ISS) and abbreviated injury scale (AIS) scores were generated by trauma registrars at each site (these are available in the NTDB). We defined specific intracranial hemorrhage types using the "predot" AIS codes.<sup>13</sup> We defined hypotension using standard Pediatric Advanced Life Support criteria based on the pre-hospital and ED vital signs present in the NTDB.<sup>14</sup> Drugs were identified using Clinical Transaction Classification (CTC) codes from the PHIS database.

#### **Post hoc Subgroup Analyses**

When we restricted the cohort to subjects with head AIS scores 3-5, we found that ICP monitoring was associated with worse functional survival: odds ratio 1.36 (95% CI 1.01-1.85). When we used an exposure period of 48 instead of 24 hours and restricted the cohort to those with a length of stay of at least 48 days, we also found ICP monitoring was associated with worse functional survival: OR 1.46 (95% CI 1.04-2.06). These analyses were otherwise identical to the primary analysis.

#### **Sensitivity Analyses**

We evaluated the likelihood of unmeasured confounding using the approach established by VanderWeele.<sup>15</sup> To do so, we considered an unmeasured confounder such as a binary variable where  $U = 1$  represented that a patient's GCS

score did not improve to a certain level after all sedatives were metabolized.  $U = 0$  would represent that a patient's GCS did improve to that level when off of sedation. The unmeasured confounder could also be a composite of neurologic exam findings. We then estimated the effect of such an unmeasured confounder across ranges of probabilities of a) bad outcome given ICP monitor placement with  $U = 1$ , b) bad outcome given ICP monitor placement with  $U = 0$ , c)  $U = 1$  given ICP monitor placement and a matrix of covariates, and d)  $U = 1$  given no ICP monitor placement and a matrix of covariates. See eFigure 4.

**eFigure 1.** Standardized Differences for Propensity Model Covariates, Before and After Propensity Weighting

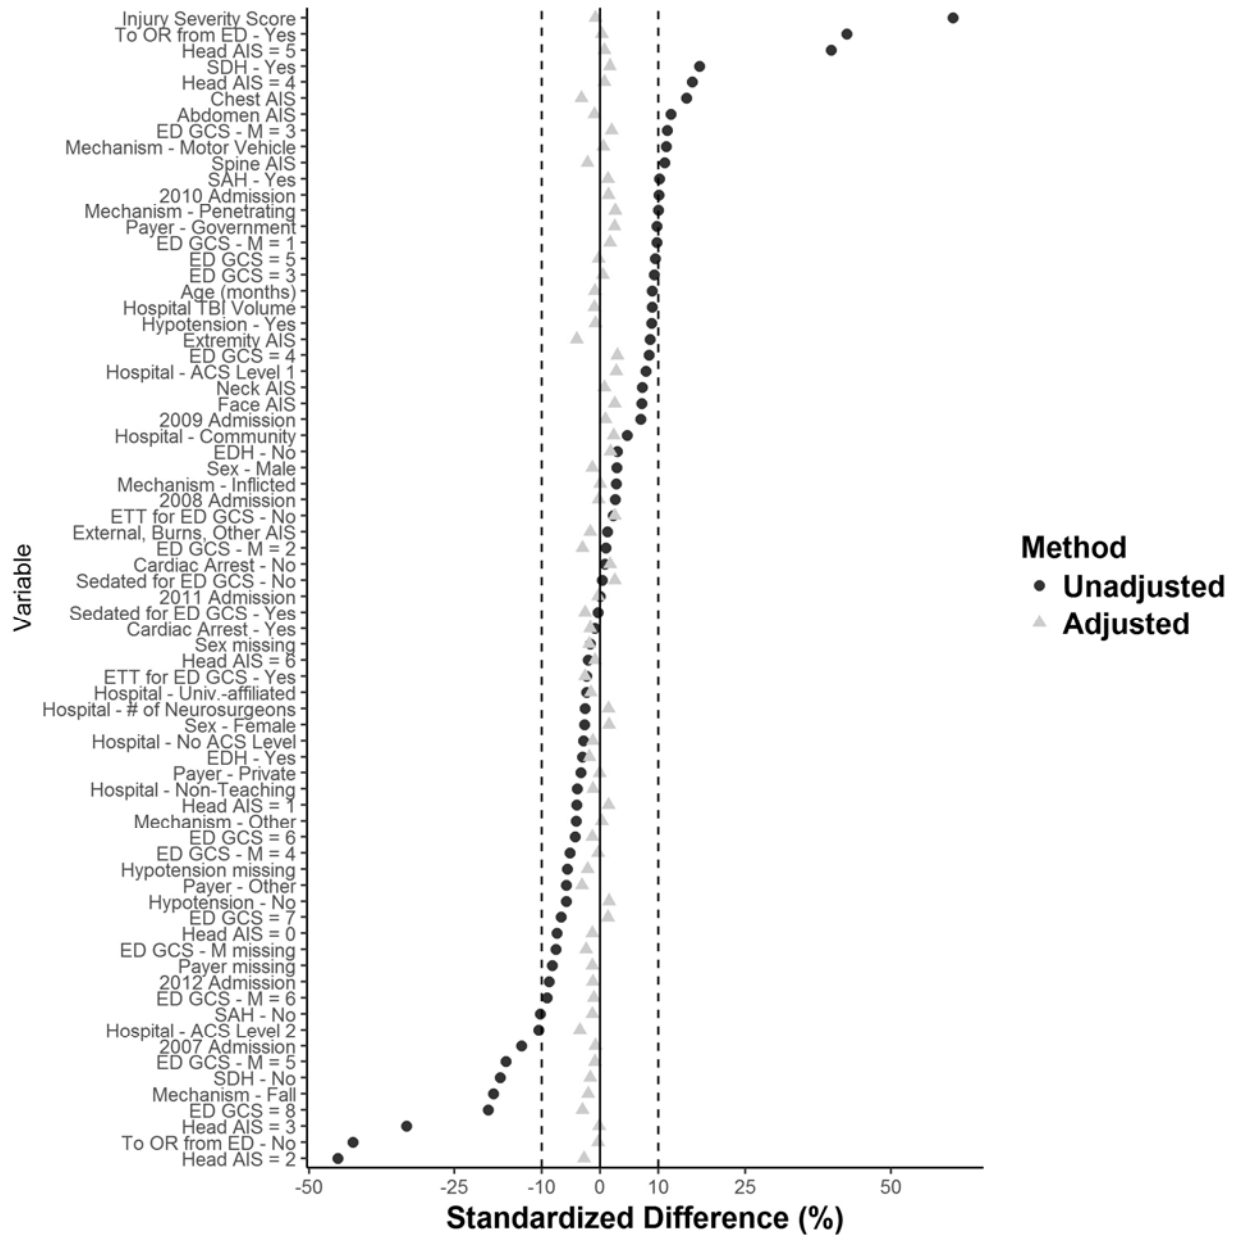

eFigure 1 Legend: All standardized differences are < 10% after propensity weighting.

**eFigure 2. ICP Monitoring Rates by Hospital**

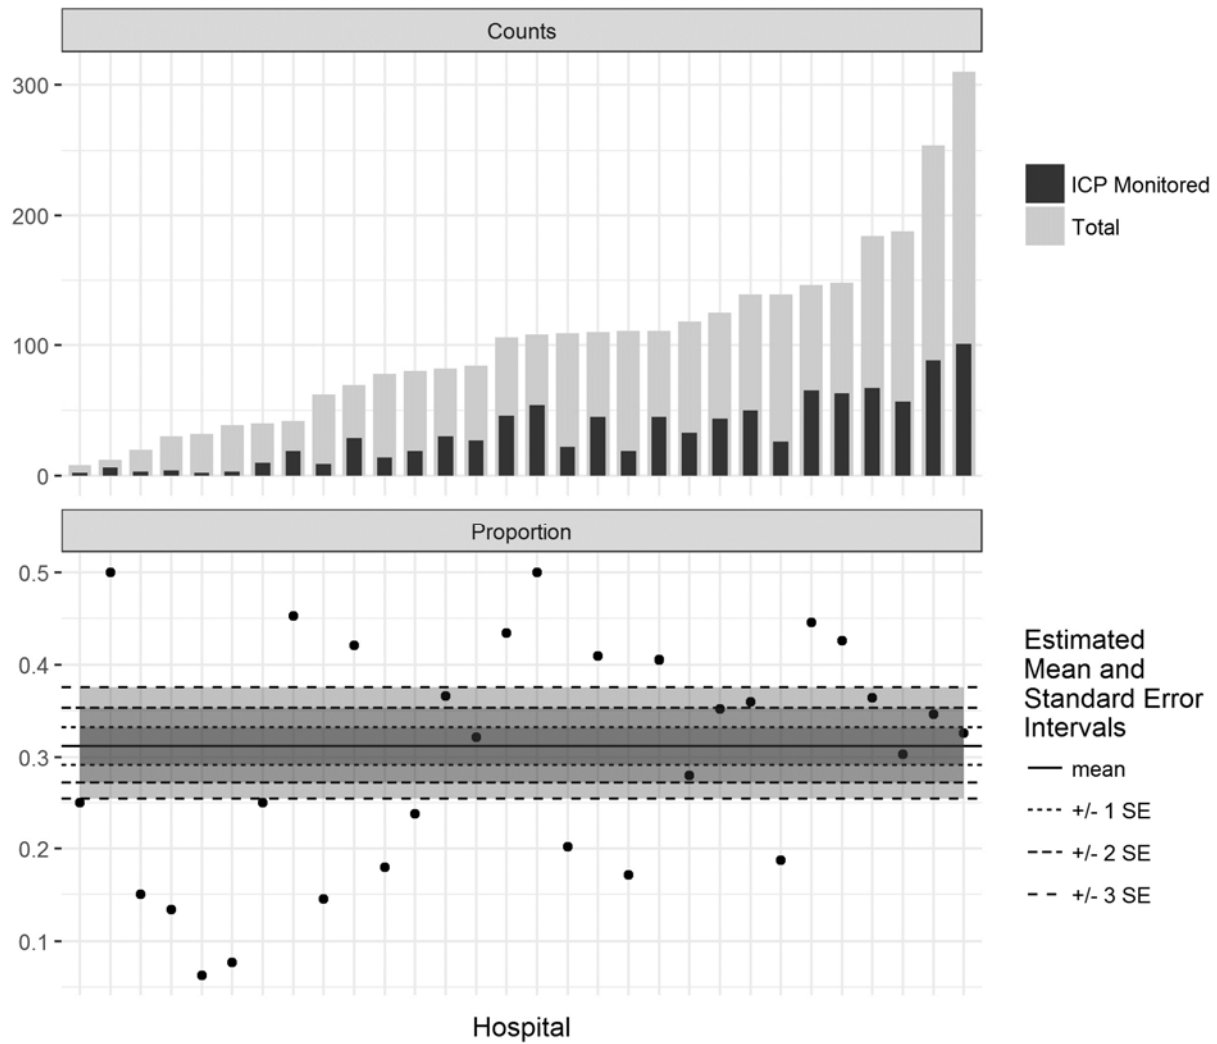

eFigure 2 Legend: ICP = intracranial pressure; SE = standard error. The upper panel shows raw counts of patients and patients with ICP monitoring by hospital. The lower panel shows the proportion of patients at each hospital who received ICP monitoring. The mean shown is the proportion of patients in the entire cohort who received ICP monitoring. A generalized estimating equations model with a binary outcome (ICP monitor yes/no), exchangeable correlation structure, and clustering by hospital was used to generate the standard errors shown.

**eFigure 3.** Choice of Matching Weights Did Not Affect Primary Analysis

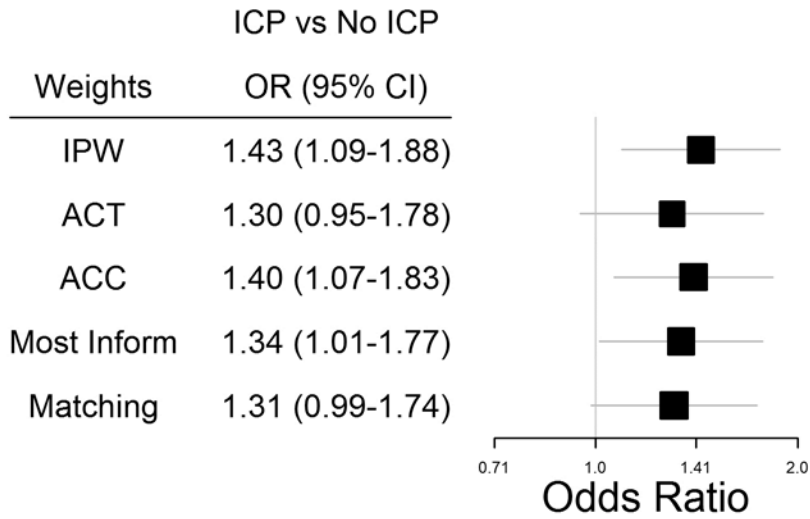

eFigure 3 Legend: ICP = intracranial pressure; OR = odds ratio; IPW = inverse probability weighting; ACT = absolute causal effect in the treated; ACC = absolute causal effect in the control; "Most Inform" = Causal effect in the population for which the study sample is most informative. An OR > 1 reflects worse outcomes with ICP monitoring.

**eFigure 4.** Sensitivity Analyses for Robustness to Unmeasured Confounding

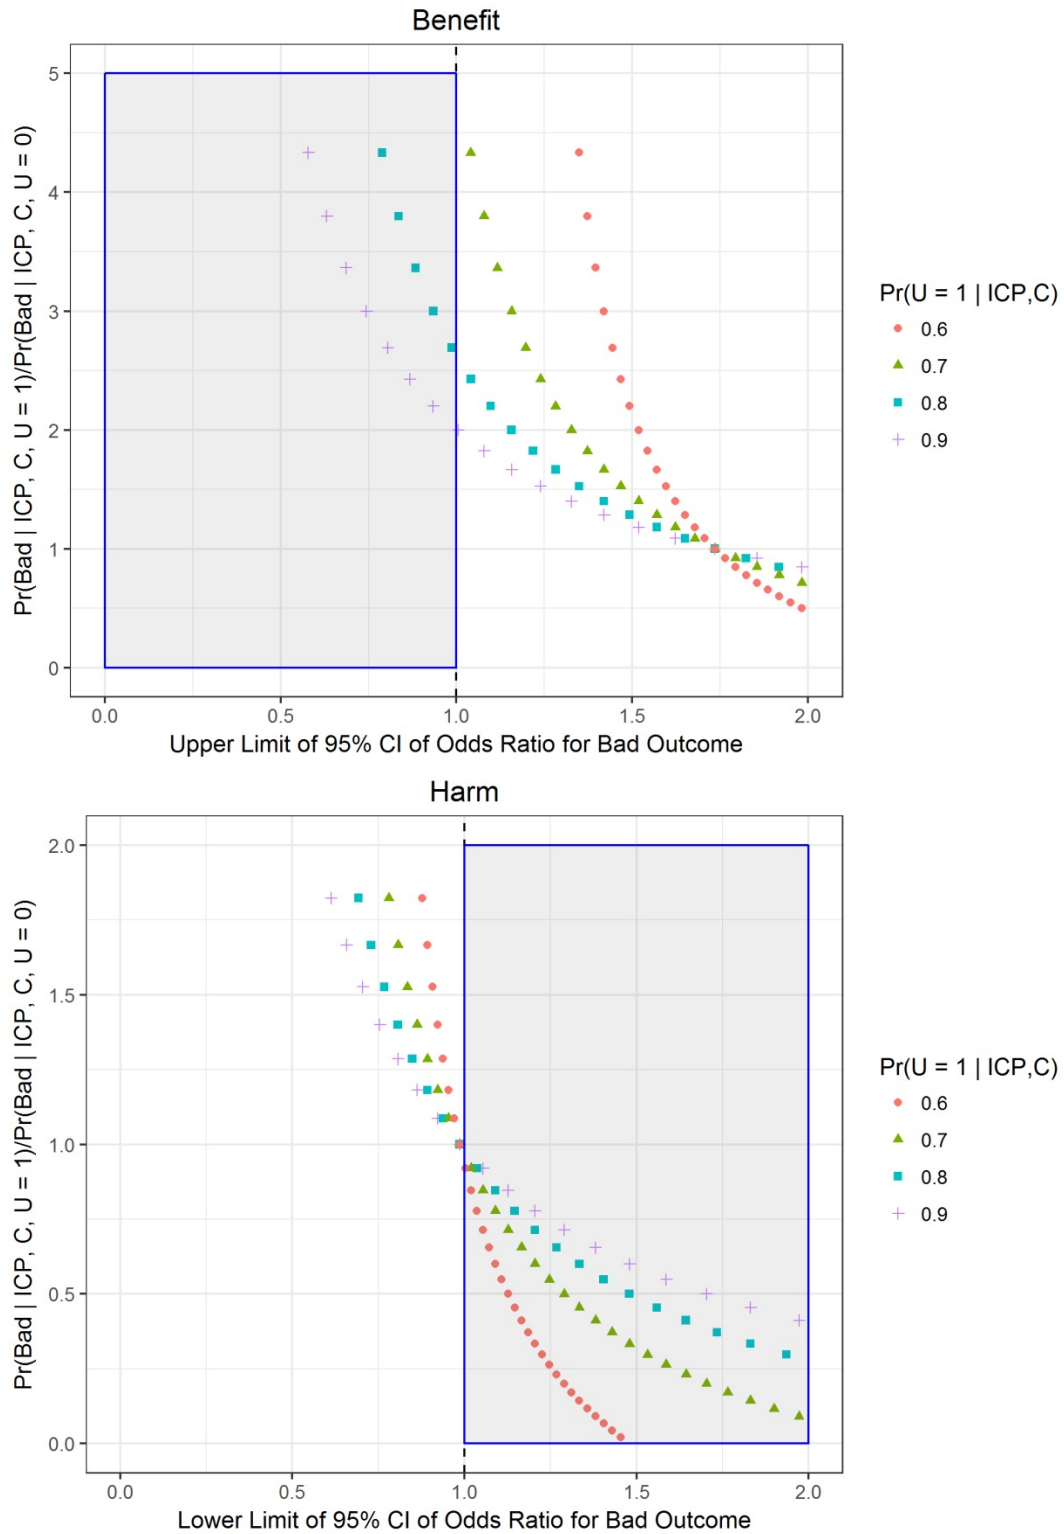

eFigure 4 Legend: Pr = probability; ICP = intracranial pressure; C = a subject's vector of covariates; "Bad" = Bad (Primary) Outcome; U = Unmeasured binary confounder (see text); CI = confidence interval; In the upper panel, points to the left of the vertical

dashed line represent scenarios consistent with a statistically significant benefit associated with ICP monitoring. In the lower panel, points to the right of the vertical dashed line represent scenarios consistent with a statistically significant harm associated with ICP monitoring. See text and eMethods for details.



**eTable 1. Variable Definitions**

| Diagnosis                 | PHIS ICD-9-CM codes                         | NTDB ICD-9-CM codes                                  | CTC codes |
|---------------------------|---------------------------------------------|------------------------------------------------------|-----------|
| Seizure                   | 345.x, 780.3, 780.33, or 780.39             |                                                      |           |
| Cardiac arrest            | 427.5x                                      |                                                      |           |
| Abuse/Assault             |                                             | E960.0, E961-E968, 995.50, 995.54, 995.55, or 995.59 |           |
| <b>Procedure</b>          |                                             |                                                      |           |
| ICP monitoring            | 01.10, 01.31, or 02.21                      | OR 01.10, 01.31, or 02.21                            | OR 255551 |
| Craniotomy or Craniectomy | 01.24, 01.25, 01.31, 01.59, 02.11, or 02.12 |                                                      |           |
| New Gastrostomy Tube      | 43.11 or 43.19                              | 43.11 or 43.19                                       |           |
| New Tracheostomy          |                                             | 31.29 or 31.1x                                       |           |
| <b>Injury</b>             |                                             |                                                      |           |
|                           | <b>predot AIS codes</b>                     |                                                      |           |
| EDH                       | 140630, 140632, 140634, or 140636           |                                                      |           |
| SAH                       | 140684                                      |                                                      |           |
| SDH                       | 140650, 140652, 140654, or 140656           |                                                      |           |

PHIS = Pediatric Health Information Systems. ICD-9-CM = International Classification of Diseases, 9th revision, Clinical Modification. NTDB = National Trauma Data Bank. CTC = Clinical Transaction Classification. AIS = Abbreviated Injury Scale. EDH = Epidural hematoma. SAH = Subarachnoid hemorrhage. SDH = Subdural hematoma.

**eTable 2. Propensity Model Covariates**

| Demographics/Events             | Injuries/Exam    | Hospital                |
|---------------------------------|------------------|-------------------------|
| Age                             | ISS              | ACS level               |
| Gender                          | 9 AIS scores     | Teaching                |
| Insurance                       | EDH              | Number of neurosurgeons |
| Admission Year                  | ED GCS           | Volume                  |
| Mechanism                       | ED GCS-Motor     |                         |
| EMS or ED Hypotension           | ED GCS (sedated) |                         |
| Cardiac Arrest<br>to OR from ED | ED GCS (ETT)     |                         |

ISS = injury severity score; ACS = American College of Surgeons; AIS = worst abbreviated injury scale scores for each of 9 body regions; EDH = epidural hematoma; EMS = Emergency Medical Services: pre-hospital care; ED = Emergency Department; GCS = Glasgow Coma Scale; sedated = sedated at time of ED GCS assessment; ETT = intubated at time of ED GCS assessment. OR = operating room.

**eTable 3. Demographic and Hospital Characteristics**

| Variable, n (%) unless shown      | No ICP, n = 2,082 | ICP, n = 1,002 | SMD (%) |
|-----------------------------------|-------------------|----------------|---------|
| <b>Demographics</b>               |                   |                |         |
| Age (months), median (IQR)        | 81 (27, 147)      | 90 (32, 156)   | 8.76    |
| Female                            | 768 (37)          | 360 (36)       | 2.52    |
| <b>Admission Year</b>             |                   |                |         |
| 2007                              | 284 (14)          | 98 (10)        | 17.66   |
| 2008                              | 396 (19)          | 198 (20)       |         |
| 2009                              | 343 (16)          | 188 (19)       |         |
| 2010                              | 339 (16)          | 202 (20)       |         |
| 2011                              | 323 (16)          | 159 (16)       |         |
| 2012                              | 397 (19)          | 157 (16)       |         |
| <b>Insurance Status</b>           |                   |                |         |
| Government                        | 1,035 (50)        | 539 (54)       | 10.60   |
| Private Insurance                 | 697 (33)          | 325 (32)       |         |
| Other                             | 261 (13)          | 109 (11)       |         |
| Missing                           | 89 (4)            | 29 (3)         |         |
| <b>Hospital ACS Certification</b> |                   |                |         |
| None                              | 695 (33)          | 317 (32)       | 11.89   |
| Level 1                           | 1,238 (59)        | 638 (64)       |         |
| Level 2                           | 149 (7)           | 47 (5)         |         |
| <b>Hospital Volume</b>            |                   |                |         |
| 0 - 10 per year                   | 174 (8)           | 49 (5)         | 8.94    |
| 11 - 20 per year                  | 836 (40)          | 392 (39)       |         |
| 21 - 30 per year                  | 449 (22)          | 248 (25)       |         |
| > 30 per year                     | 623 (30)          | 313 (31)       |         |
| <b>Hospital Neurosurgeons</b>     |                   |                |         |
| 0 - 3                             | 817 (39)          | 415 (41)       | 2.24    |
| 4 - 5                             | 1,157 (56)        | 562 (56)       |         |
| 6 - 10                            | 108 (5)           | 25 (2)         |         |
| <b>Hospital Teaching Status</b>   |                   |                |         |
| University Hospital               | 1,724 (83)        | 821 (82)       | 6.13    |
| Community Hospital                | 273 (13)          | 148 (15)       |         |
| Non-Teaching                      | 85 (4)            | 33 (3)         |         |

The standardized mean differences (SMDs) shown are prior to propensity weighting. ICP = intracranial pressure; IQR = interquartile range; ACS = American College of Surgeons. When calculating the SMD's, age, hospital volume, and the number of neurosurgeons were treated as continuous variables. All other variables were considered categorical.

**eTable 4. Injury Characteristics**

| Variable, n (%) unless shown       | No ICP, n = 2,082 | ICP, n = 1,002 | SMD (%) |
|------------------------------------|-------------------|----------------|---------|
| <b>Injury Mechanism</b>            |                   |                | 21.45   |
| Motor Vehicle                      | 859 (41)          | 477 (48)       |         |
| Abuse/Assault                      | 452 (22)          | 223 (22)       |         |
| Fall                               | 349 (17)          | 107 (11)       |         |
| Penetrating                        | 11 (1)            | 14 (1)         |         |
| Other                              | 411 (20)          | 181 (18)       |         |
| <b>Injury Severity Score (ISS)</b> |                   |                | 58.52   |
| median (IQR)                       | 18 (11, 26)       | 26 (20, 34)    |         |
| mean (SD)                          | 20 ± 12           | 27 ± 11        |         |
| minimum                            | 0                 | 0              |         |
| maximum                            | 75                | 75             |         |
| <b>Intracranial Hemorrhages</b>    |                   |                |         |
| EDH                                | 151 (7)           | 66 (7)         | 2.62    |
| SDH                                | 410 (20)          | 258 (26)       | 14.49   |
| SAH                                | 279 (13)          | 172 (17)       | 10.48   |
| <b>Worst Head AIS score</b>        |                   |                |         |
| 0                                  | 137 (7)           | 51 (5)         |         |
| 1                                  | 14 (1)            | 4 (0)          |         |
| 2                                  | 269 (13)          | 16 (2)         |         |
| 3                                  | 310 (15)          | 53 (5)         |         |
| 4                                  | 1,102 (53)        | 616 (61)       |         |
| 5                                  | 244 (12)          | 260 (26)       |         |
| 6                                  | 6 (0)             | 2 (0)          |         |
| <b>ED GCS score</b>                |                   |                | 22.33   |
| 3                                  | 1,300 (62)        | 670 (67)       |         |
| 4                                  | 75 (4)            | 50 (5)         |         |
| 5                                  | 71 (3)            | 51 (5)         |         |
| 6                                  | 238 (11)          | 104 (10)       |         |
| 7                                  | 195 (9)           | 77 (8)         |         |
| 8                                  | 203 (10)          | 50 (5)         |         |
| <b>ED GCS-Motor score</b>          |                   |                | 23.08   |
| 1                                  | 1,357 (65)        | 699 (70)       |         |
| 2                                  | 95 (5)            | 44 (4)         |         |
| 3                                  | 85 (4)            | 66 (7)         |         |
| 4                                  | 316 (15)          | 137 (14)       |         |
| 5                                  | 168 (8)           | 43 (4)         |         |
| 6                                  | 28 (1)            | 5 (0)          |         |
| missing                            | 33 (2)            | 8 (1)          |         |
| <b>ED GCS measurement</b>          |                   |                |         |

|                            |            |          |      |
|----------------------------|------------|----------|------|
| Intubated                  | 1,517 (73) | 719 (72) | 2.47 |
| Sedated                    | 1,061 (51) | 508 (51) | 0.52 |
| <b>Disposition from ED</b> |            |          |      |
| OR                         | 118 (6)    | 160 (16) |      |
| ICU                        | 1,780 (85) | 749 (75) |      |
| Floor                      | 67 (3)     | 42 (4)   |      |
| Other/Missing              | 117 (6)    | 51 (5)   |      |

The standardized mean differences (SMDs) shown are prior to propensity weighting. ICP = intracranial pressure; ISS = injury severity score; IQR = interquartile range; EDH = epidural hematoma; SDH = subdural hematoma; SAH = subarachnoid hemorrhage; AIS = abbreviated injury scale; ED = Emergency Department; GCS = Glasgow Coma Scale; OR = operating room; ICU = intensive care unit. When calculating the SMD's, ISS and the AIS variables were treated as continuous variables. All other variables were considered categorical.

## eReferences.

1. Gerber JS, Newland JG, Coffin SE, et al. Variability in antibiotic use at children's hospitals. *Pediatrics*. 2010;126(6):1067-1073. [http://www.ncbi.nlm.nih.gov/entrez/query.fcgi?cmd=Retrieve&db=PubMed&dopt=Citation&list\\_uids=21078728](http://www.ncbi.nlm.nih.gov/entrez/query.fcgi?cmd=Retrieve&db=PubMed&dopt=Citation&list_uids=21078728).
2. Bratton SL, Newth CJ, Zuppa AF, et al. Critical care for pediatric asthma: Wide care variability and challenges for study. *Pediatr Crit Care Med*. 2012;13(4):407-414. <http://www.ncbi.nlm.nih.gov/pubmed/22067984>.
3. Conway PH, Keren R. Factors associated with variability in outcomes for children hospitalized with urinary tract infection. *J Pediatr*. 2009;154(6):789-796. [http://www.ncbi.nlm.nih.gov/entrez/query.fcgi?cmd=Retrieve&db=PubMed&dopt=Citation&list\\_uids=19324369](http://www.ncbi.nlm.nih.gov/entrez/query.fcgi?cmd=Retrieve&db=PubMed&dopt=Citation&list_uids=19324369).
4. Slonim AD, Khandelwal S, He J, et al. Characteristics associated with pediatric inpatient death. *Pediatrics*. 2010;125(6):1208-1216. [http://www.ncbi.nlm.nih.gov/entrez/query.fcgi?cmd=Retrieve&db=PubMed&dopt=Citation&list\\_uids=20457682](http://www.ncbi.nlm.nih.gov/entrez/query.fcgi?cmd=Retrieve&db=PubMed&dopt=Citation&list_uids=20457682).
5. American College of Surgeons Committee on Trauma. *National Trauma Data Bank Research Data Set User Manual, Admission Year 2009*. Chicago, IL
6. Bennett TD, Dean JM, Keenan HT, McGlincy MH, Thomas AM, Cook LJ. Linked Records of Children with Traumatic Brain Injury. Probabilistic Linkage without Use of Protected Health Information. *Methods Inf Med*. 2015;54(4):328-337. doi:10.3414/ME14-01-0093.
7. Kee VR, Gilchrist B, Granner MA, Sarrazin NR, Carnahan RM. A systematic review of validated methods for identifying seizures, convulsions, or epilepsy using administrative and claims data. *Pharmacoepidemiol Drug Saf*. 2012;21 Suppl 1:183-193. doi:10.1002/pds.2329.
8. Bennett KS, DeWitt PE, Harlaar N, Bennett TD. Seizures in children with severe traumatic brain injury. *Pediatric critical care medicine : a journal of the Society of Critical Care Medicine and the World Federation of Pediatric Intensive and Critical Care Societies*. 2017;18(1):54-63. doi:10.1097/PCC.0000000000000948.
9. Hooft A, Ronda J, Schaeffer P, Asnes AG, Leventhal JM. Identification of physical abuse cases in hospitalized children: Accuracy of international classification of diseases codes. *J Pediatr*. 2013;162(1):80-85. doi:10.1016/j.jpeds.2012.06.037.
10. Leventhal JM, Martin KD, Gaither JR. Using US data to estimate the incidence of serious physical abuse in children. *Pediatrics*. 2012;129(3):458-464. doi:10.1542/peds.2011-1277.
11. Centers for Disease Control and Prevention. Recommended framework for presenting injury mortality data. *MMWR*. 1997;46(RR-14). <http://www.cdc.gov/mmwr/preview/mmwrhtml/00049162.htm>.
12. Barell V, Aharonson-Daniel L, Fingerhut LA, et al. An introduction to the barell body region by nature of injury diagnosis matrix. *Inj Prev*. 2002;8(2):91-96. <http://www.ncbi.nlm.nih.gov/pubmed/12120842>.
13. Alali AS, Gomez D, Sathya C, et al. Intracranial pressure monitoring among children with severe traumatic brain injury. *J Neurosurg Pediatr*. 2015;16(5):523-532. doi:10.3171/2015.3.PEDS14507.
14. 2005 american heart association (aha) guidelines for cardiopulmonary resuscitation (cpr) and emergency cardiovascular care (ecc) of pediatric and neonatal patients: Pediatric advanced life support. *Pediatrics*. 2006;117(5):e1005-28. [http://www.ncbi.nlm.nih.gov/entrez/query.fcgi?cmd=Retrieve&db=PubMed&dopt=Citation&list\\_uids=16651281](http://www.ncbi.nlm.nih.gov/entrez/query.fcgi?cmd=Retrieve&db=PubMed&dopt=Citation&list_uids=16651281).
15. VanderWeele TJ. *Explanation in Causal Inference: Methods for Mediation and Interaction*. Oxford University Press; 2015.
